# Supplementary material for: Use of Edible, Medicinal, and Aromatic Plants in Various Health Disorders: A Cross-Sectional Evaluation among Inhabitants in the Area of Thrace, North-Eastern Greece
Source: MDPI journal article supplement (doi:10.3390/ijerph191912576), 2022-10-01
Supplement: s1 [file s1]

Figure S1: Structure of the major phytoconstituents found in the commonly consumed MAPs.

| MAPs common name ( <i>scientific name</i> )          | Names of the major phytoconstituents | Structure of the major phytoconstituents                                             |
|------------------------------------------------------|--------------------------------------|--------------------------------------------------------------------------------------|
| Chamomile ( <i>Chamaemelum nobile</i> )              | Rosmarinic acid                      |                                                                                      |
|                                                      | Caffeic acid                         | 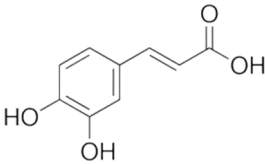   |
|                                                      | Apigenin                             |    |
|                                                      | Luteolin                             |   |
| Green Tea and Black Tea ( <i>Camellia sinensis</i> ) | Catechin                             |  |
|                                                      | Epigallocatechin Gallate             |  |
|                                                      | Theaflavins                          |  |
|                                                      | Epicatechin Gallate                  |  |

|                                               |                                                                                     |                                                                                                                                                                                                                                                                                                                                                    |
|-----------------------------------------------|-------------------------------------------------------------------------------------|----------------------------------------------------------------------------------------------------------------------------------------------------------------------------------------------------------------------------------------------------------------------------------------------------------------------------------------------------|
| <p>Mountain Tea<br/>(<i>Sideritis L.</i>)</p> | <p>Apigenin</p> <p>Luteolin</p> <p>5-Caffeoylquinic acid</p> <p>p-Coumaric acid</p> | 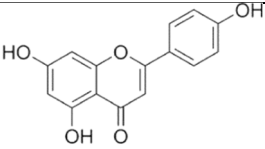           |
| <p>Aloysa (<i>Aloysia citrodora</i>)</p>      | <p>Apigenin</p> <p>Catechin Gallate</p> <p>Limonene</p> <p>Citronellol</p>          |     |
